# Supplementary material for: Three-dimensional iron oxyfluoride/N-doped carbon hybrid nanocomposites as high-performance cathodes for rechargeable Li-ion batteries
Source: Royal Society of Chemistry journal article supplement (doi:10.1039/c8qi01057a), 2018-12-18
Supplement: c8qi01057a1.pdf [file c8qi01057a1.pdf]

## Supporting Information

### **Three-dimensional iron oxyfluoride/N-doped carbon hybrid nanocomposites as high-performance cathodes for rechargeable Li-ion batteries**

Xiaopeng Li,<sup>a</sup> Yongzhi Zhang,<sup>b</sup> Yan Meng,<sup>a</sup> Yujue Wang,<sup>b</sup> Guangqun Tan,<sup>a</sup> Hongyan Yuan<sup>a</sup> and Dan Xiao<sup>\*,a,b</sup>

<sup>a</sup> College of Chemical Engineering, Sichuan University, No. 24 South Section 1, Yihuan Road, Chengdu, 610065, PR China

<sup>b</sup> Institute of New Energy and Low-Carbon Technology (INELT), Sichuan University, No. 24 South Section 1, Yihuan Road, Chengdu, 610065, PR China

\* E-mail: xiaodan@scu.edu.cn (D. Xiao)

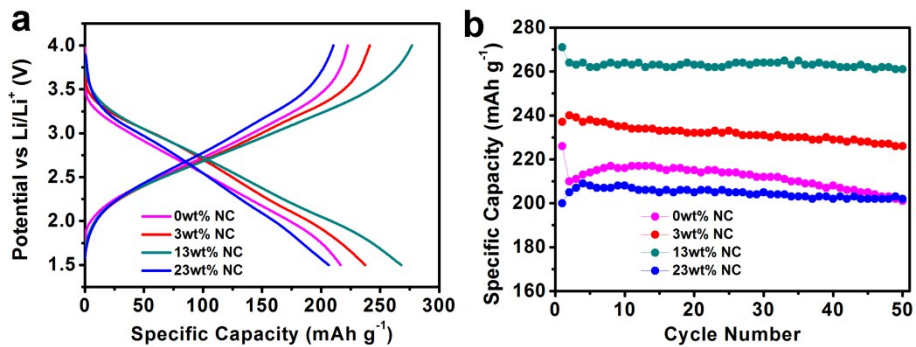

**Fig. S1** (a) Charge/discharge curves of the FeOF/NC electrode with different contents of NC at a constant current density of 0.2 A g<sup>-1</sup> in the voltage range of 1.5-4.0 V at room temperature. (b) Corresponding specific capacity vs. cycle number.

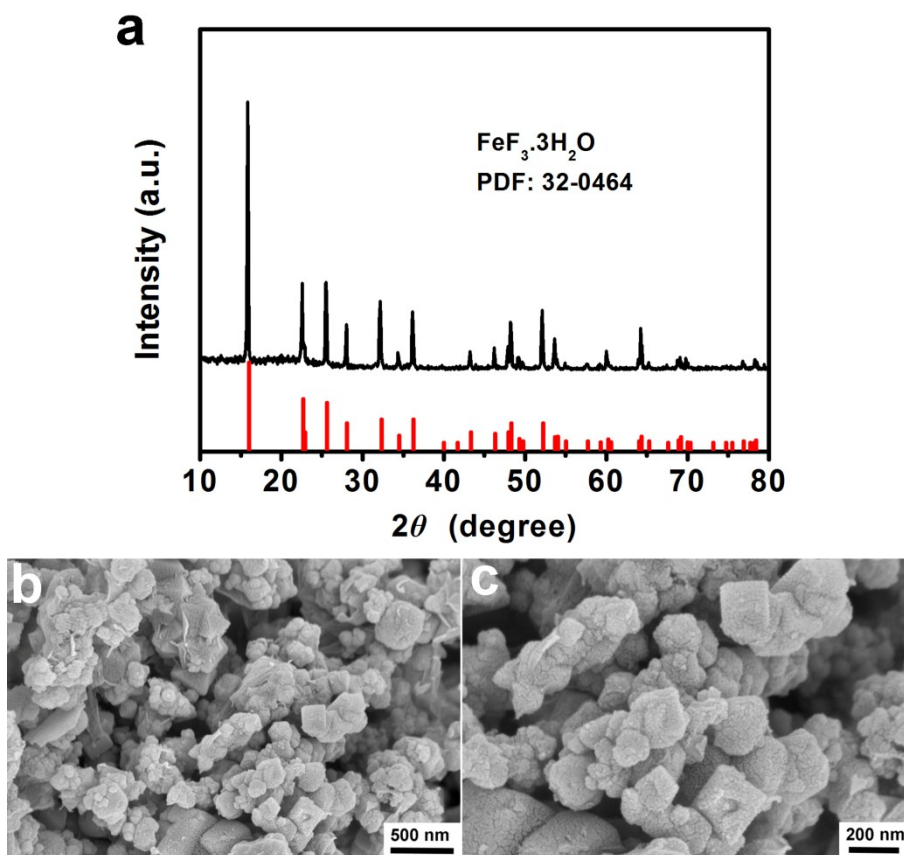

**Fig. S2** (a) XRD pattern of the FeF<sub>3</sub>·3H<sub>2</sub>O precursors. (b, c) SEM images of the FeF<sub>3</sub>·3H<sub>2</sub>O precursors.

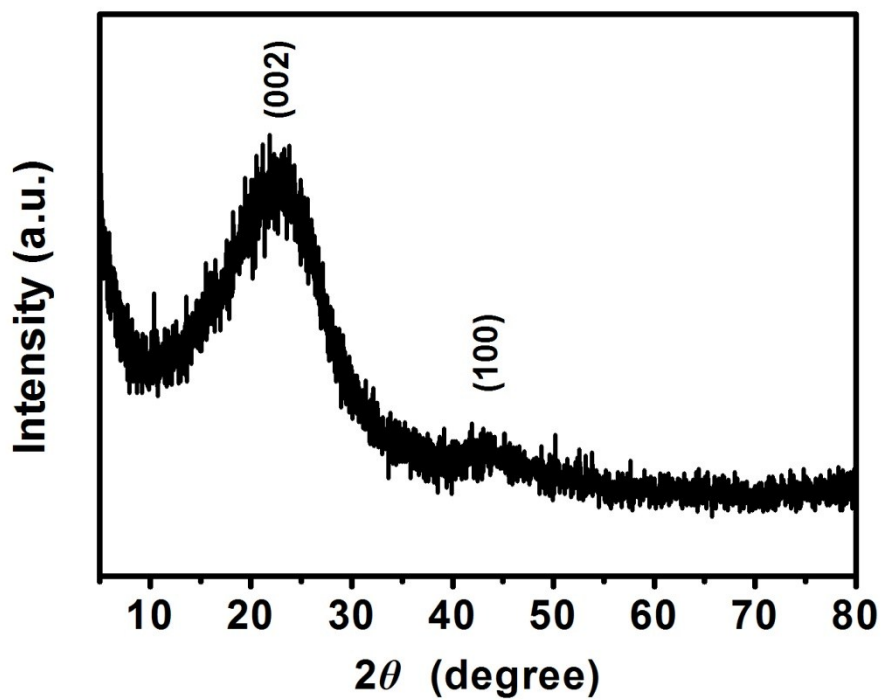

**Fig. S3** XRD pattern of the as-prepared porous NC matrix. It can be obviously seen that the NC is a typical amorphous carbon.

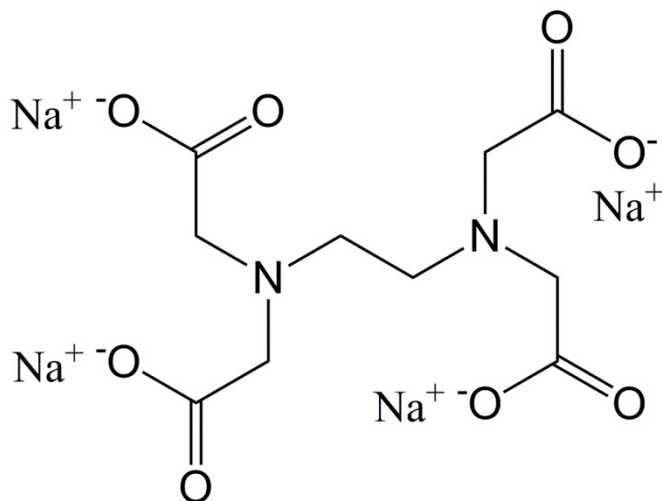

**Fig. S4** The molecular structure of the Na<sub>4</sub>EDTA. It can be seen that the nitrogen atoms exist in its structure.

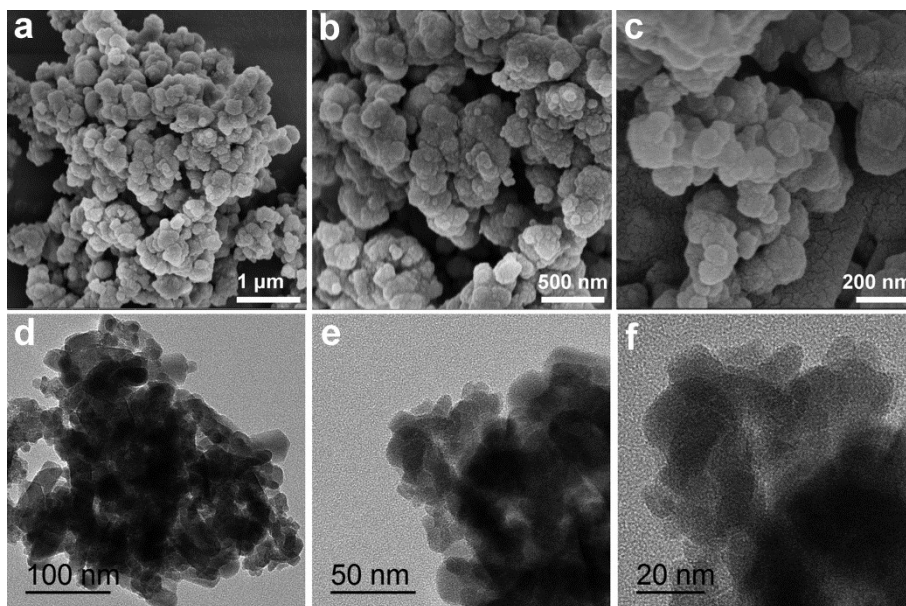

**Fig. S5** (a-c) SEM images of the as-synthesized bare FeOF. (d-f) TEM images of the as-synthesized bare FeOF. From the above SEM and TEM images, it can be clearly seen that these bare FeOF particles are aggregating together, which is due to the absence of porous NC matrix to disperse FeOF nanoparticles.

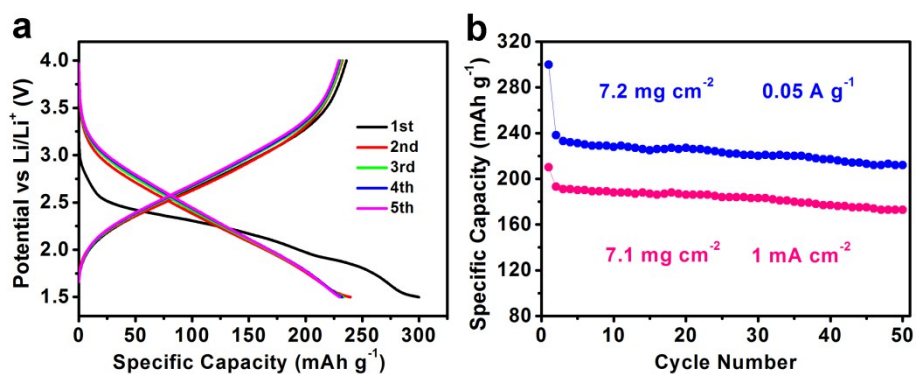

**Fig. S6** (a) Discharge/charge curves of the 3D FeOF/NC electrode with a high mass loading of 7.2 mg cm<sup>-2</sup> at a constant current density of 0.05 A g<sup>-1</sup> in the voltage range of 1.5-4.0 V at room temperature. (b) The cycling performance of the electrodes at 0.05 A g<sup>-1</sup> and 1 mA cm<sup>-2</sup>.

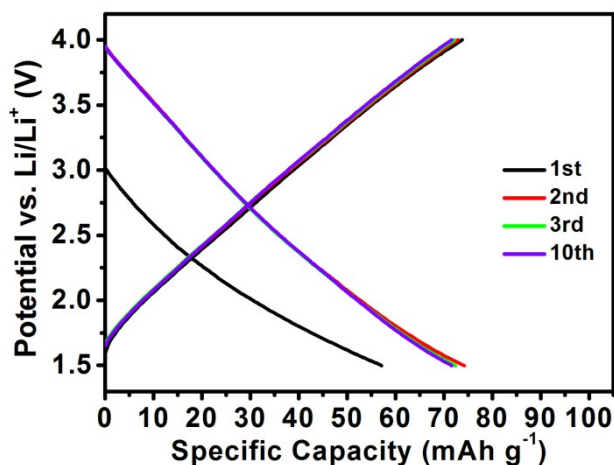

**Fig. S7** Discharge/charge curves of the NC electrode at a constant current density of 0.2 A g<sup>-1</sup> in the voltage range of 1.5-4.0 V at room temperature. Considering the weight ratio of NC is 13 wt% in the nanocomposites, therefore, it could contribute about 3.5% to the overall electrode capacity.

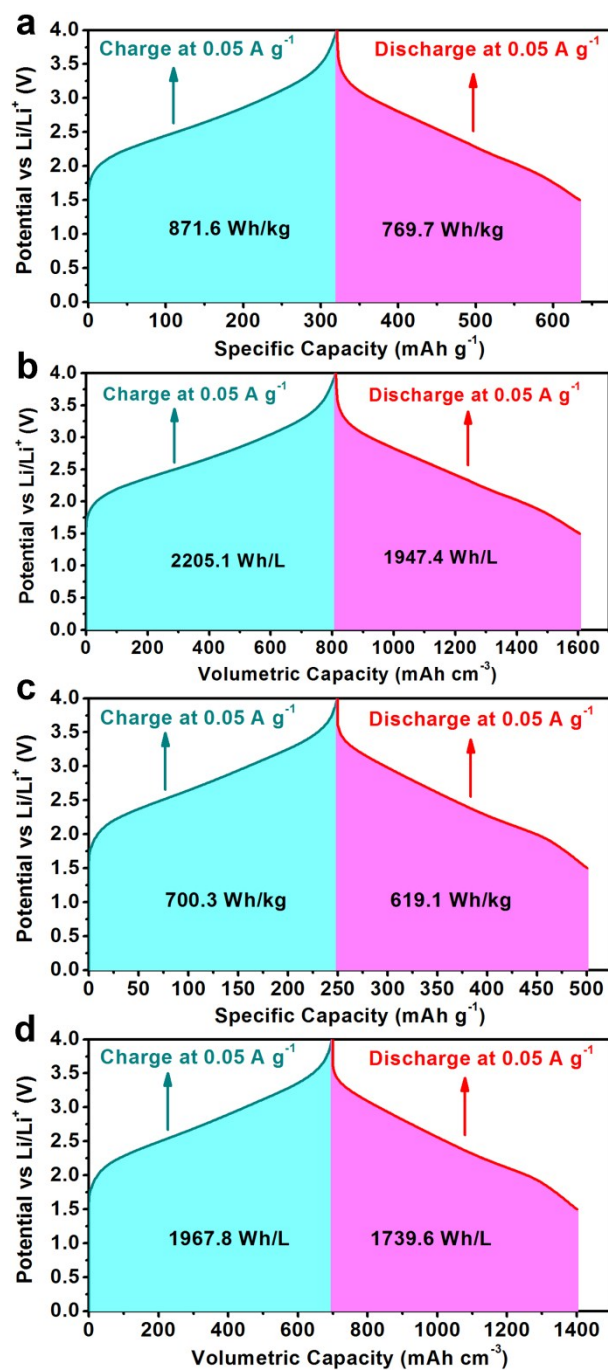

**Fig. S8** Comparison of gravimetric energy densities and volumetric energy densities for (a, b) FeOF/NC and (c, d) FeOF based on their charge/discharge curves at  $0.05 \text{ A g}^{-1}$ .

**Table S1** Comparison of the electrochemical performance of 3D FeOF/NC with other iron oxyfluoride/fluoride cathode electrodes based on conversion reaction process.

| Materials                                           | Voltage range (V) | Rate capacity (mAh g <sup>-1</sup> ) | Rate (mA g <sup>-1</sup> ) | Cycling capacity (mAh g <sup>-1</sup> )/Current density (mA g <sup>-1</sup> )/(Cycle number) | Ref.      |
|-----------------------------------------------------|-------------------|--------------------------------------|----------------------------|----------------------------------------------------------------------------------------------|-----------|
| FeOF@PEDOT                                          | 1.2-4.0           | 230                                  | 400                        | 407/50/150 <sup>th</sup>                                                                     | [S1]      |
| LiPON/FeOF                                          | 1.2-4.0           | 250                                  | 300                        | 222/300/100 <sup>th</sup>                                                                    | [S2]      |
| C/FeOF/FeF <sub>3</sub>                             | 1.5-4.5           | 70                                   | 200                        | 130/20/50 <sup>th</sup>                                                                      | [S3]      |
| FeF <sub>2</sub> @CNT                               | 1.3-4.3           | 133                                  | 1000                       | 181/100/50 <sup>th</sup>                                                                     | [S4]      |
| FeF <sub>3</sub> @GF-scCO <sub>2</sub>              | 1.4-4.5           | 130                                  | 1000                       | 145/200/30 <sup>th</sup>                                                                     | [S5]      |
| FeF <sub>3</sub> /C                                 | 1.5-4.5           | 71                                   | 1040                       | 198.9/20.8/50 <sup>th</sup>                                                                  | [S6]      |
| FeF <sub>3</sub> /G                                 | 1.5-4.5           | 73                                   | 1040                       | 119.9/208/100 <sup>th</sup>                                                                  | [S7]      |
| FeF <sub>3</sub> ·xH <sub>2</sub> O/G               | 1.5-4.5           | 130                                  | 1185                       | 183/237/100 <sup>th</sup>                                                                    | [S8]      |
| FeF <sub>3</sub> @NAN                               | 1.0-4.5           | 79                                   | 1780                       | 215/71/110 <sup>th</sup>                                                                     | [S9]      |
| FeF <sub>3</sub> (H <sub>2</sub> O) <sub>3</sub> /C | 1.5-4.5           | 210                                  | 70                         | 200/70/30 <sup>th</sup>                                                                      | [S10]     |
| 3D FeOF/NC                                          | 1.5-4.0           | 241                                  | 500                        | 246/200/100 <sup>th</sup>                                                                    | This Work |
|                                                     |                   | 213                                  | 1000                       | 191/1000/300 <sup>th</sup>                                                                   |           |
|                                                     |                   | 184                                  | 2000                       |                                                                                              |           |

## References

- [S1] X. L. Fan, C. Luo, J. Lamb, Y. J. Zhu, K. Xu and C. S. Wang, *Nano Lett.*, 2015, **15**, 7650-7656.
- [S2] C. F. Lin, X. L. Fan, A. Pearse, S. C. Liou, K. Gregorczyk, M. Leskes, C. S. Wang, S. B. Lee, G. W. Rubloff and M. Noked, *Chem. Mater.*, 2017, **29**, 8780-8791.
- [S3] W. W. Li, Y. Li, M. H. Fang, X. L. Yao, T. T. Li, M. Shui and J. Shu, *Ionics*, 2018, **24**, 1561-1569.
- [S4] J. S. Zhou, D. Zhang, X. T. Zhang, H. H. Song and X. H. Chen, *ACS Appl. Mater. Interfaces*, 2014, **6**, 21223-21229.
- [S5] X. Hu, M. Ma, R. G. Mendes, M. Zeng, Q. Zhang, Y. Xue, T. Zhang, M. H. Rummeli and L. Fu, *J. Mater. Chem. A*, 2015, **3**, 23930-23935.
- [S6] R. G. Ma, M. Wang, P. P. Tao, Y. Wang, C. W. Cao, G. C. Shan, S. L. Yang, L. J. Xi, J. C. Y. Chung and Z. G. Lu, *J. Mater. Chem. A*, 2013, **1**, 15060-15067.
- [S7] R. G. Ma, Z. G. Lu, C. D. Wang, H. E. Wang, S. L. Yang, L. J. Xi and J. C. Y. Chung, *Nanoscale*, 2013, **5**, 6338-6343.
- [S8] Y. Q. Shen, X. Y. Wang, H. Hu, M. L. Jiang, X. K. Yang and H. B. Shu, *J. Power Sources*, 2015, **283**, 204-210.
- [S9] J. Jiang, L. P. Li, M. W. Xu, J. H. Zhu and C. M. Li, *ACS Appl. Mater. Interfaces*, 2016, **8**, 16240-16247.
- [S10] Y. L. Shi, N. Wu, M. F. Shen, Y. L. Cui, L. Jiang, Y. H. Qiang and Q. C. Zhuang, *ChemElectroChem*, 2014, **1**, 645-654.
